# Supplementary material
Source: MDPI journal article supplement (https://www.mdpi.com/2077-0472/13/5/1063)
Supplement: s1 [file s1 › agriculture-2370082-supplementary.pdf]

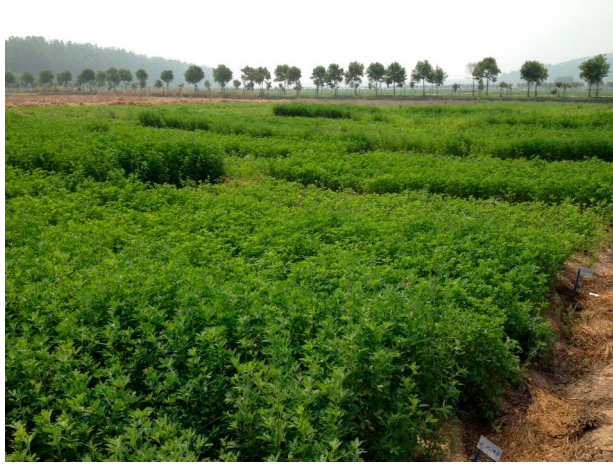

**Figure S1.** The experimental site with the alfalfa crops.

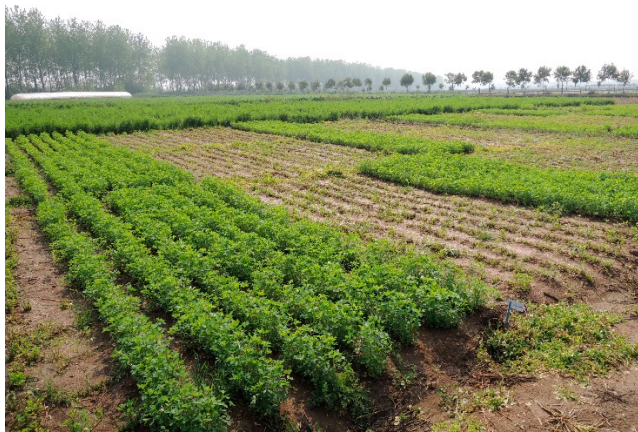

**Figure S2.** The experimental site with the alfalfa crops.
